1 **Title page**

2 **Linear age-course association between non-alcoholic fatty liver disease, components of**  
3 **metabolic syndrome, and mortality**

4

5 Xinyu Zhao<sup>a,b</sup>, Shuohua Chen<sup>c</sup>, Xiao mo Wang<sup>a</sup>, Zhenyu Wang<sup>a</sup>, Yuanyuan Sun<sup>a</sup>, Chenlu Yang<sup>a</sup>,

6 Mengyi Zheng<sup>d</sup>, Yanhong Wang<sup>a</sup>, Wei Liao<sup>a</sup>, Shouling Wu<sup>c,\*</sup>, Li Wang<sup>a,\*</sup>

7

8 <sup>a</sup>Department of Epidemiology and Biostatistics, Institute of Basic Medical Sciences Chinese  
9 Academy of Medical Sciences; School of Basic Medicine Peking Union Medical College, Beijing,  
10 China

11 <sup>b</sup>Department of Clinical Epidemiology and EBM, Beijing Friendship Hospital, Capital Medical  
12 University; National Clinical Research Center for Digestive Diseases, Beijing, China

13 <sup>c</sup>Department of Cardiology, Kailuan General Hospital, Tangshan, China

14 <sup>d</sup>Cardiovascular Center, Beijing Tongren Hospital, Capital Medical University, Beijing, China

15 **\*Corresponding author:**

16 Li Wang

17 Department of Epidemiology and Biostatistics, Institute of Basic Medical Sciences Chinese  
18 Academy of Medical Sciences; School of Basic Medicine Peking Union Medical College, 5 Dong  
19 Dan San Tiao, Beijing 100005, China. E-mail address: [liwang@ibms.pumc.edu.cn](mailto:liwang@ibms.pumc.edu.cn)

20 Shouling Wu

21 Department of Cardiology, Kailuan General Hospital, Tangshan 063000, China. E-mail address:  
22 [drwusl@163.com](mailto:drwusl@163.com)

23

24 The total word count of the manuscript: 4195

25

1 **Abstract**

2 **Background:** The study aimed to explore the relationship between non-alcoholic fatty liver  
3 disease (NAFLD) and mortality by age and metabolic syndrome (MetS) components.

4 **Method:** We enrolled 104,173 participants in the Kailuan cohort from June 2006 through October  
5 2013. Cox regression models were used to evaluate the hazard ratio (HR) and 95% confidence  
6 interval (CI). Population-attributable fractions (PAFs) of metabolic components were also  
7 calculated.

8 **Results:** Compared with non-NAFLD, the excess risk of all-cause and cardiovascular disease  
9 (CVD)-related mortality in NAFLD increased with the number of MetS components but decreased  
10 with age. The highest all-cause and CVD-related death risks were observed in NAFLD aged 18-39  
11 with 4-5 MetS (HR=2.81, 95% CI:1.55-5.08) and those aged 40-49 years with 3 MetS (HR=2.25,  
12 95% CI:1.55-5.08), respectively. However, there was no significant extra risk of liver-related  
13 death in NAFLD patients of any age. For PAF, 28.5% of all-cause and 43.4% of CVD-related  
14 mortality among NAFLD patients was preventable by controlling MetS components < 2, with the  
15 highest PAF in those aged 50-69 and 18-49, respectively. Elevated blood pressure (PAF of 24.7%  
16 for all-cause; 38.6% for CVD-related), elevated fasting glucose (PAF of 13.4% all-cause; 9.2%  
17 CVD-related), and elevated triglycerides (PAF of 3.9% all-cause; 14.0% CVD-related) were the  
18 essential mortality contributors in NAFLD participants.

19 **Conclusion:** The excess risk of all-cause and CVD-related mortality in NAFLD patients decreases  
20 with age. A substantial proportion of risks could be averted if NAFLD patients are controlled  
21 under two MetS components, especially managing blood pressure, fasting glucose, and  
22 triglycerides for the young.

23 **Key words:** Non-alcoholic fatty liver disease; metabolic syndrome; mortality; attributable  
24 population fraction; cohort.

25 **Abbreviations:** non-alcoholic fatty liver disease (NAFLD); metabolic syndrome (MetS);  
26 cardiovascular disease (CVD); elevated blood pressure (BP); systolic blood pressure (SBP);  
27 diastolic blood pressure (DBP); elevated fasting blood glucose (FBG); triglyceride (TG); high-  
28 density lipoprotein (HDL).

29

30

31

## 1 **1. Introduction**

2 Non-alcoholic fatty liver disease (NAFLD) is the most prevalent chronic liver disease worldwide,  
3 with a global prevalence of 30%<sup>1</sup>. NAFLD may increase the risk of cardiovascular disease,  
4 chronic kidney disease, and some specific cancers<sup>2,3</sup>. However, its impact on mortality is still  
5 controversial due to the difference in the study population's characteristics and the diagnosis  
6 method of NAFLD<sup>4-8</sup>. Most NAFLD-related mortality studies were based on western people or  
7 limited by highly selected patient populations<sup>4,5,9,10</sup>.

8 The participants with NAFLD are often accompanied by components of metabolic syndrome  
9 (MetS). Studies have shown that the risk of all-cause mortality gradually increased with the  
10 number of components of MetS<sup>11</sup>. Also, the early onset of the individual component of MetS, such  
11 as obesity, diabetes, and hypertension, has been reported to have a higher risk of death than those  
12 with late onset<sup>12-14</sup>. Furthermore, our cohort study in a Northern Chinese population has shown a  
13 modified effect of age on the association between NAFLD and mortality<sup>15</sup>. All the above  
14 information suggests that age may modify the effect of NAFLD on all-cause mortality.  
15 Additionally, it is unclear what extent of deaths can be reduced by controlling MetS components  
16 of NAFLD patients to normal levels.

17 Using the Kailuan cohort in China, we aimed to: (1) evaluate the association between the excess  
18 risk of mortality among patients with NAFLD versus non-NAFLD participants by the number of  
19 MetS components; (2) quantify the proportions of deaths in the NAFLD and non-NAFLD that can  
20 be reduced by controlling different MetS components to normal levels.

## 21 **2. Methods**

### 22 ***2.1 Study population***

23 Starting from 2006 and being followed up every two years, the Kailuan cohort is an ongoing  
24 longitudinal prospective cohort based on the Kailuan community in Tangshan, China. In this  
25 study, we enrolled 159,018 participants who entered the cohort between 2006-2013. We excluded  
26 54,804 participants due to the following: (1) having liver cirrhosis at baseline (n=170); (2)  
27 excessive alcohol consumption (alcohol intake  $\geq 30$  g/day for men and  $\geq 20$  g/day for women) or  
28 with alcohol intake missing (n=42524); (3) hepatitis B surface antigen (HBsAg) positive or  
29 missing (n=4931); (4) missing on the fatty liver by B ultrasound (n=6864); (5) death within one  
30 year from the baseline (n=315); or (6) three or more missing values of MetS components (n=41).  
31 Finally, 104,173 participants were included (Supplementary Figure 1).

32 The Ethics Committees of the Kailuan General Hospital and the Institute of Basic Medical  
33 Sciences Chinese Academy of Medical Sciences approved this study. We obtained informed  
34 consent from all participants.

### 35 ***2.2 Definition of NAFLD, MetS, and its metabolism components***

36 Using abdominal ultrasonography (PHILIPS HD-15), fatty liver was diagnosed by experienced  
37 radiologists blinded to clinical presentation and laboratory results. Participants with fatty liver

1 were defined as NAFLD because we excluded individuals with excessive alcohol consumption or  
2 other causes of chronic liver disease. We utilized the diagnostic criteria proposed by the  
3 International Diabetes Federation (2009) <sup>16</sup> to define MetS by the presence of  $\geq 3$  of the following  
4 components: abdominal obesity, elevated blood pressure (BP), fasting blood glucose (FBG) serum  
5 triglyceride (TG), and high-density lipoprotein (HDL) (detailed in Supplementary text).

### 6 **2.3 Follow-up and outcome assessment**

7 We followed all the participants to the date of death, or 12-31-2019, which came first. Death  
8 certificates were obtained annually from the Kailuan social security system and provincial vital  
9 statistics offices. The cause of death listed on the death certificate was classified following the 10<sup>th</sup>  
10 version of the International Classification of Diseases (ICD-10). We defined the cause of death  
11 due to cardiovascular disease (CVD) with codes of ICD-10 I00-I69 <sup>17</sup> and liver-related mortality  
12 with ICD-10 of C22, B15-B19, I85, K70- K76 <sup>18</sup>. Death causes were collected before 31  
13 December 2016, so the follow-up ended at the date of death or 12-31-2016 when analyzing the  
14 risk of CVD-related and liver-related death.

### 15 **2.4 Potential confounders**

16 We conducted questionnaire surveys to collect demographic characteristics (age, sex, and  
17 education level), lifestyle factors (smoking, drinking, and physical activity), medical history, and  
18 medications of all the participants. Height, weight, waist, and blood pressure were measured by  
19 trained field workers. Laboratory tests, including TG, HDL, alanine aminotransferase (ALT),  
20 FBG, and HBsAg were assessed in the central lab.

### 21 **2.5 Statistical methods**

22 Variables were presented as mean  $\pm$  standard deviation or number (%) and compared using  
23 analysis of variance or Chi-square test, respectively. The age- and sex- standardized prevalence of  
24 MetS component for NAFLD and non-NAFLD populations were estimated using the Chinese  
25 2010 census population as the reference <sup>19</sup>. We conducted the Kaplan-Meier to calculate the  
26 mortality rate. Compared to the non-NAFLD, the Cox proportional hazards model with age as the  
27 timescale was used to estimate the HRs and 95% confidence intervals (CIs) of NAFLD with the  
28 different numbers of MetS components after adjusting for age, sex, education, smoking, physical  
29 activity, salt intake, and ALT level. We divided the participants into six groups (18-39, 40-49, 50-  
30 59, 60-69, 70-79, and  $\geq 80$  years) because we found an age-dependent hazard ratio (HR) between  
31 NAFLD and death risk (Supplementary Figure 2). We also conducted sensitivity analyses to verify  
32 the results: (1) using the original complete dataset, (2) excluding females, (3) excluding drinkers,  
33 (4) defining NAFLD as the participants diagnosed with moderate or severe fatty liver for the low  
34 sensitivity and specificity of ultrasound in the diagnosis of mild fatty liver <sup>20,21</sup>, and (5) excluding  
35 participants with cancers or cardiovascular disease (myocardial infarction, stroke, subarachnoid  
36 hemorrhage, cerebral infarction, cerebral hemorrhage or heart failure) at baseline.

1 Furthermore, we assessed the adjusted overall and age-specific population-attributable fraction  
2 (PAF) of deaths that contributed to MetS components in the NAFLD and compared them with that  
3 in the non-NAFLD using a method for cohort study<sup>22</sup>. We used multiple imputations by chained  
4 equations to impute one complete dataset with five interactions, which showed equal distribution  
5 before and after imputation (Supplementary Table 1).

6 Analyses were implemented with SAS version 9.4 (SAS Institute Inc. Cary, NC), R version 3.5.2  
7 (<https://www.r-project.org/>), or Stata 15.0.

### 8 **3. Results**

#### 9 ***3.1 Baseline characteristics and the prevalence of metabolic components***

10 Among 104,173 participants with a mean age of 49.2±14.0 years old, NAFLD was identified in  
11 32,384 (31.1%) participants, 74.9% of whom combined with >1 MetS component, significantly  
12 higher than in the non-NAFLD (35.7%). In the NAFLD group, the average age and the proportion  
13 of people with low education levels, high-intensity physical exercise, salt preference, and high  
14 ALT gradually increased with the increasing number of MetS components (Table 1).

15 The standardized prevalence of each MetS component in the NAFLD group was significantly  
16 higher than that in the non-NAFLD group (Table 2). The highest difference in prevalence between  
17 NAFLD and non-NAFLD was abdominal obesity (62.7% vs. 27.3%), then the elevated TG (47.5%  
18 vs. 18.4%) and elevated BP (50.9% vs. 30.7%).

#### 19 ***3.2 Associations between NAFLD with the different numbers of MetS components and CVD-,*** 20 ***liver-related, and all-cause mortality.***

21 During a median follow-up of 12.7 years, 10442 subjects died. The 10-year all-cause mortality  
22 rates (Figure 1A) of the non-NAFLD (7.5%) were significantly lower than the NAFLD with 3  
23 (10.3%) and 4-5 MetS components (11.6%) but higher than the NAFLD with 0-1 MetS  
24 component (1.5%),  $p < 0.001$ . Similar phenomena were observed in CVD-related death (Figure  
25 1B,  $p < 0.001$ ). Although existing an increased trend, we did not observe a significant difference  
26 in liver-related mortality between NAFLD with the different numbers of MetS components and  
27 non-NAFLD (Figure 1C,  $p=0.314$ ).

#### 28 ***3.3 Associations between NAFLD with the different numbers of MetS components and CVD- ,*** 29 ***liver-related, and all-cause mortality by age***

30 Figure 2A showed that the excess risk of all-cause mortality for NAFLD vs. non-NAFLD  
31 increased with the number of metabolic component abnormalities but linearly declined with age.  
32 In the subjects with 4-5 MetS components but aged < 40, NAFLD patients had the highest all-  
33 cause mortality risk (HR=2.81, 95% CI:1.55-5.08,  $p=0.001$ ).

34 For CVD-related mortality (Figure 2B), higher risks for NAFLD vs. non-NAFLD was only

1 observed in those aged 40-69 and with >2 MetS components. For the NAFLD patients with 3  
2 MetS components, the HR(95% CI) for those aged 30-49, 50-59, and 60-69 was 2.25(1.46-3.45),  
3 1.34(1.03-1.74), and 1.41(1.15-1.74). For NAFLD patients with 4-5 MetS components, the  
4 HR(95% CI) at the corresponding age was 1.86 (0.97-3.57), 1.85(1.37-2.49), and 1.64(1.27-2.12).  
5 However, we did not observe an excess risk of liver-related death risk in NAFLD patients in any  
6 age group (figure 2C). So we did not perform further PAF-related analyses for liver-related death.

7 The sensitivity analysis showed a consistent result after excluding females, drinkers, individuals  
8 with cancers or CVD, NAFLD with mild fatty liver, or using original data (Supplementary Table  
9 2-4).

#### 10 ***3.4 Association between metabolic components and all-cause and CVD-related death by*** 11 ***NAFLD status***

12 Table 3 showed the association between MetS components and all-cause mortality by NAFLD  
13 status. Due to the limited outcome events in the NAFLD patients, we regrouped the age category  
14 into <50, 50-69, and ≥70 years. Both in the NAFLD and non-NAFLD populations, elevated FBG  
15 (HR=1.36, 95% CI:1.27-1.46 in the NAFLD; HR=1.29, 95% CI:1.23-1.36 in the non-NAFLD)  
16 and elevated BP (HR=1.49, 95% CI:1.38-1.62 in the NAFLD; HR=1.39, 95% CI:1.32-1.47 in the  
17 non-NAFLD) were significantly associated with all-cause death after multivariable adjustments.  
18 Elevated TG (HR=1.08, 95% CI:1.01-1.16) was only observed to be a risk factor for death in the  
19 NAFLD, and abdominal obesity in the non-NAFLD (HR=1.07, 95% CI:1.01-1.12). However,  
20 HRs of elevated BP on death declined with age in both NAFLD and non-NAFLD groups.  
21 HR(95%CI) decreased from 1.66(1.32-2.09) for those aged 18-49 to 1.21(1.04-1.40) for those  
22 aged ≥70 in the NAFLD and from 1.66 (1.40-1.98) to 1.12(1.03-1.21) in the non-NAFLD  
23 correspondingly.

24 Regarding CVD-related death (Table 4), the results were similar to all-cause mortality. The risk  
25 effect of elevated BP (HR=1.94, 95% CI:1.63-2.30 in the NAFLD; HR=1.65, 95% CI:1.49-1.84 in  
26 the non-NAFLD) and evaluated TG ((HR=1.33, 95% CI:1.16-1.53 in the NAFLD; HR=1.13, 95%  
27 CI:1.01-1.27 in the non-NAFLD) on CVD-related death was more prominent than that on the all-  
28 cause mortality. And the risk effect of evaluated TG also declined with age. HR(95%CI) decreased  
29 from 1.58(0.99-2.55) to 1.24(0.98-1.57) in the NAFLD group and from 1.56(1.02-2.37) to  
30 1.03(0.85-1.24) in the non-NAFLD group.

#### 31 ***3.5 PAFs of metabolic components to all-cause/CVD-related mortality among NAFLD and*** 32 ***non-NAFLD patients***

33 The prevalence of MetS components by age was shown in Supplementary Table 5. The MetS  
34 components increased with age, except for the reduced HDL in the NAFLD and non-NAFLD  
35 participants.

36 Table 3 showed the PAFs of MetS components to all-cause death by NAFLD status. For both  
37 NAFLD and non-NAFLD participants, the largest adjusted PAF of MetS components was elevated

1 BP (24.7% in the NAFLD and 17.0% in the non-NAFLD), and then the elevated FBG (13.4% in  
2 the NAFLD and 7.5% in the non-NAFLD). With age increasing, the PAF of elevated BP (from  
3 26.2% to 13.0% in the NAFLD and from 17.6% to 6.8% in the non-NAFLD) and elevated FBG  
4 (from 12.7% to 8.5% in the NAFLD, and from 11.8% to 2.7% in the non-NAFLD) were both  
5 declined.

6 Like all-cause of death, elevated BP had the largest adjusted PAF for CVD-related death in both  
7 NAFLD patients (38.6% ) and non-NAFLD (25.9%) (Table 4). However, the elevated TG (14.0%)  
8 had a slightly higher PAF than the elevated FBG (9.2%) for NAFLD patients. The elevated FBG  
9 (8.5%) still had the second-largest PAF for non-NAFLD patients. Similarly, the PAFs of elevated  
10 BP (from 44.9% to 20.9% in the NAFLD and from 19.9% to 8.0% in the non-NAFLD) and  
11 elevated TG (from 24.0% to 9.7% in the NAFLD, and from 11.7% to 0.5% in the non-NAFLD)  
12 dramatically declined with age.

13 For the multiple MetS components, 28.5% of all-cause deaths and 43.4% of CVD-related deaths  
14 could be potentially averted by controlling the subjects with NAFLD to combining less than one  
15 MetS component, more than twice in the subjects without NAFLD (all-cause mortality: 12.5%;  
16 CVD-related mortality: 16.3%).

#### 17 **4. Discussion**

18 Our study found that the standardized prevalence of abdominal obesity, elevated BP, TG, and  
19 FBG, and reduced HDL reached 62.7%, 50.9%, 47.5%, 36.9%, and 21.8% among NAFLD  
20 patients, respectively. Compared to non-NAFLD, The highest all-cause and CVD-related death  
21 risks were observed in NAFLD aged 18-39 with 4-5 MetS (HR=2.81, 95% CI:1.55-5.08) and  
22 those aged 40-49 years with 3 MetS (HR=2.25, 95% CI:1.55-5.08). Higher than in non-NAFLD,  
23 all-cause of death could be attributable to 24.7% of elevated BP and 13.4% of elevated FBG in the  
24 NAFLD population. Similarly, CVD-related death could be attributable to 38.6% of high BP,  
25 9.2% of elevated FBG, and 14.0% of elevated TG.

26 Our analysis showed that patients with NAFLD aged 18-39 with 4-5 MetS components had the  
27 highest excess risk of all-cause mortality compared with non-NAFLD. Notably, we identified a  
28 monotonic relationship between the increasing age of NAFLD patients and lowered extra risk of  
29 all-cause mortality and CVD-related mortality, which could be supported by the research on the  
30 early onset of hypertension<sup>12</sup>, obesity<sup>13</sup>, and diabetes<sup>14</sup> to the excess deaths or CVD-related  
31 mortality.

32 The present study indicated that 28.5% of all-cause deaths and 43.4% of CVD-related deaths  
33 among NAFLD patients could be attributable to presenting  $\geq 2$  MetS component, suggesting that  
34 reducing MetS components  $< 1$  may substantially reduce mortality, consistent with a previous  
35 study using the NHANES III data<sup>23</sup>. Furthermore, our study showed that 24.7% of the all-cause  
36 and 38.6% of CVD-related mortality in NAFLD participants were attributable to elevated BP,  
37 slightly lower than a study from the NHANES III data (adjusted PAF of 23% of all-cause and 52.8%  
38 of CVD-related mortality)<sup>23</sup>. With a prevalence of elevated BP of 50.9% in our NAFLD

1 population, hypertension is an independent driver of the progression of NAFLD to non-alcoholic  
2 steatohepatitis, advanced liver fibrosis, cirrhosis, and hepatocellular carcinoma<sup>24,25</sup>. Also, CVD  
3 risk has been proven to be increased with more advanced liver disease from a meta-analysis of 36  
4 longitudinal studies, furtherly supporting our results<sup>2</sup>. Our former study found that even in the  
5 NAFLD with normal BMI, those with hypertension had a higher risk of all-cause death and CVD  
6<sup>26</sup>, suggesting the importance of controlling blood pressure for NAFLD participants.

7 Elevated FBG was found to be attributed to 13.4% of all-cause mortality in NAFLD, higher than  
8 that in non-NAFLD (7.5%). The higher prevalence of elevated FBG in the NAFLD (36.9%) than  
9 that in non-NAFLD (20.0%) could explain the difference since the similar HR for elevated FBG  
10 and all-cause mortality in the NAFLD (HR=1.36) and non-NAFLD (HR=1.29) group. Similar  
11 results were observed for CVD-related death (PAF: 13.4% in NAFLD vs. 7.5% in non-NAFLD).  
12 Diabetes could promote NAFLD progression to cirrhosis and fibrosis and increase the all-cause  
13 mortality risk<sup>27,28</sup>. Insulin resistance could explain the higher risk of all-cause and CVD-related  
14 mortality in the participants with elevated FBG.

15 Elevated TG was found to be the second-largest contributor to CVD-related death (PAF=14%) in  
16 NAFLD patients, higher than that of elevated FBG (9.2%). It can be explained by the significant  
17 risk effect ( elevated TG: HR=1.33 vs. elevated FBG: HR=1.23 ) and higher prevalence (elevated  
18 TG: 47.5% vs. elevated FBG: 36.9%) of elevated TG in NAFLD patients. Serum elevated TG has  
19 been suggested to be an indicator of atherogenic dyslipidemia. Together with hyperglycemia,  
20 oxidative stress and inflammation activation, dysregulated lipid metabolism could create a pro-  
21 atherogenic environment attributing to CVD development<sup>29</sup>. We also found that the PAFs of  
22 elevated BP and elevated TG to all-cause or CVD-related mortality in NAFLD patients declined  
23 with age, which could be explained by the decreased HRs of elevated BP and TG with age.

24 This study has some limitations. Firstly, we did not collect hepatitis C infection information, so  
25 patients with hepatitis C were not excluded. However, given the relatively low rate of hepatitis C  
26 infection in the Chinese population (1%-3%), the estimated association between NAFLD, MetS,  
27 and all-cause mortality has little impact<sup>30</sup>. Secondly, 80% of the participants were male, so the  
28 impact of NAFLD and MetS components on all-cause mortality in females and its potential sex  
29 differences needs further exploration. Finally, the association between NAFLD and liver-related  
30 mortality needs more cases and longer follow-ups to prove.

## 31 **5. Conclusion**

32 For NAFLD patients combined with more than one MetS component, its excess risk of all-cause  
33 and CVD-related mortality decreased with age. Substantial proportions of deaths, especially CVD-  
34 related deaths, could be averted if NAFLD patients are controlled under two MetS components,  
35 especially controlling elevated blood pressure, fasting glucose, and triglycerides.

## 36 **Acknowledgement**



1 The authors thank all the members of the Kailuan Study Team for their contribution and the  
2 participants who contributed their data.

3 **Funding:** This work was supported by CAMS Innovation Fund for Medical Sciences (CIFMS)(2021-  
4 I2M-1-023), the Capital's Funds for Health Improvement and Research (CHF 2022-1-2021), and the  
5 Beijing Municipal Administration of Hospitals Incubating Program (PX2022001).

## 6 **Declarations**

7 **Conflict of interest:** All authors, including Xinyu Zhao, Shuohua Chen, Xiao mo Wang , Zhenyu  
8 Wang , Yuanyuan Sun , Chenlu Yang , Mengyi Zheng , Yanhong Wang, Wei Liao, Shouling Wu, and  
9 Li Wang, report no conflicts of interest.

10 **Ethical approval and Informed consent:** The Ethics Committees of the Kailuan General Hospital  
11 and the Institute of Basic Medical Sciences Chinese Academy of Medical Sciences approved this  
12 study. We obtained informed consent from all participants.

13 **Data availability:** The data used or analyzed during this study are included in this article and available  
14 from the corresponding author upon reasonable request.

15

## 16 **Reference**

- 17 1. Younossi ZM, Golabi P, Paik JM, Henry A, Van Dongen C, Henry L. The global epidemiology of  
18 nonalcoholic fatty liver disease (NAFLD) and nonalcoholic steatohepatitis (NASH): a  
19 systematic review. *Hepatology*. 2023;77:1335-1347. doi: 10.1097/hep.0000000000000004
- 20 2. Mantovani A, Csermely A, Petracca G, Beatrice G, Corey KE, Simon TG, Byrne CD, Targher G.  
21 Non-alcoholic fatty liver disease and risk of fatal and non-fatal cardiovascular events: an  
22 updated systematic review and meta-analysis. *Lancet Gastroenterol Hepatol*. 2021;6:903-913.  
23 doi: 10.1016/S2468-1253(21)00308-3
- 24 3. Adams LA, Anstee QM, Tilg H, Targher G. Non-alcoholic fatty liver disease and its relationship  
25 with cardiovascular disease and other extrahepatic diseases. *Gut*. 2017;66:1138-1153. doi:  
26 10.1136/gutjnl-2017-313884
- 27 4. Chinnadurai R, Ritchie J, Green D, Kalra PA. Non-alcoholic fatty liver disease and clinical  
28 outcomes in chronic kidney disease. *Nephrol Dial Transplant*. 2019;34:449-457. doi:  
29 10.1093/ndt/gfx381
- 30 5. Valbusa F, Agnoletti D, Scala L, Grillo C, Arduini P, Bonapace S, Calabria S, Scaturro G,  
31 Mantovani A, Zoppini G, et al. Non-alcoholic fatty liver disease and increased risk of all-cause  
32 mortality in elderly patients admitted for acute heart failure. *Int J Cardiol*. 2018;265:162-168.  
33 doi: 10.1016/j.ijcard.2018.04.129
- 34 6. Hwang Y-C, Ahn H-Y, Park S-W, Park C-Y. Nonalcoholic Fatty Liver Disease Associates With  
35 Increased Overall Mortality and Death From Cancer, Cardiovascular Disease, and Liver

- 1 Disease in Women but Not Men. *Clinical gastroenterology and hepatology*. 2018;16:1131-  
2 1137.e1135. doi: 10.1016/j.cgh.2017.11.026
- 3 7. Carrillo-Larco RM, Guzman-Vilca WC, Castillo-Cara M, Alvizuri-Gomez C, Alqahtani S, Garcia-  
4 Larsen V. Phenotypes of non-alcoholic fatty liver disease (NAFLD) and all-cause mortality:  
5 unsupervised machine learning analysis of NHANES III. *BMJ Open*. 2022;12:e067203. doi:  
6 10.1136/bmjopen-2022-067203
- 7 8. van Kleef LA, Sonneveld MJ, Kavousi M, Ikram MA, de Man RA, de Kneegt RJ. Fatty liver disease  
8 is not associated with increased mortality in the elderly: A prospective cohort study.  
9 *Hepatology*. 2023;77:585-593. doi: 10.1002/hep.32635
- 10 9. Wild SH, Walker JJ, Morling JR, McAllister DA, Colhoun HM, Farran B, McGurnaghan S,  
11 McCrimmon R, Read SH, Sattar N, et al. Cardiovascular Disease, Cancer, and Mortality Among  
12 People With Type 2 Diabetes and Alcoholic or Nonalcoholic Fatty Liver Disease Hospital  
13 Admission. *Diabetes Care*. 2018;41:341-347. doi: 10.2337/dc17-1590
- 14 10. Keskin M, Hayiroğlu Mİ, Uzun AO, Güvenç TS, Şahin S, Kozan Ö. Effect of Nonalcoholic Fatty  
15 Liver Disease on In-Hospital and Long-Term Outcomes in Patients With ST-Segment Elevation  
16 Myocardial Infarction. *Am J Cardiol*. 2017;120:1720-1726. doi:  
17 10.1016/j.amjcard.2017.07.107
- 18 11. Pegah, Golabi, Munkhzul, Otgonsuren, Leyla, Avila d, Mehmet, Sayiner, Nila, Rafiq.  
19 Components of metabolic syndrome increase the risk of mortality in nonalcoholic fatty liver  
20 disease (NAFLD). *Medicine*. 2018:e0214.
- 21 12. Wang C, Yuan Y, Zheng M, Pan A, Wang M, Zhao M, Li Y, Yao S, Chen S, Wu S, et al. Association  
22 of Age of Onset of Hypertension With Cardiovascular Diseases and Mortality. *J Am Coll*  
23 *Cardiol*. 2020;75:2921-2930. doi: 10.1016/j.jacc.2020.04.038
- 24 13. Wang Z. Age-dependent decline of association between obesity and mortality: a systematic  
25 review and meta-analysis. *Obesity research & clinical practice*. 2015;9:1-11. doi:  
26 10.1016/j.orcp.2014.01.006
- 27 14. Sattar N, Rawshani A, Franzén S, Rawshani A, Svensson AM, Rosengren A, McGuire DK,  
28 Eliasson B, Gudbjörnsdóttir S. Age at Diagnosis of Type 2 Diabetes Mellitus and Associations  
29 With Cardiovascular and Mortality Risks. *Circulation*. 2019;139:2228-2237. doi:  
30 10.1161/circulationaha.118.037885
- 31 15. Wang X, Wu S, Yuan X, Chen S, Fu Q, Sun Y, Lan Y, Hu S, Wang Y, Lu Y, et al. Metabolic  
32 Dysfunction-associated Fatty Liver Disease and Mortality Among Chinese Adults: a  
33 Prospective Cohort Study. *J Clin Endocrinol Metab*. 2022;107:e745-e755. doi:  
34 10.1210/clinem/dgab644
- 35 16. Alberti KGMM, Eckel RH, Grundy SM, Zimmet PZ, Cleeman JI, Donato KA, Fruchart J-C, James  
36 WPT, Loria CM, Smith SC. Harmonizing the Metabolic Syndrome. *Circulation*. 2009;120:1640-  
37 1645. doi: doi:10.1161/CIRCULATIONAHA.109.192644
- 38 17. Lazo M, Hernaez R, Bonekamp S, Kamel IR, Brancati FL, Guallar E, Clark JM. Non-alcoholic  
39 fatty liver disease and mortality among US adults: prospective cohort study. *Bmj*.  
40 2011;343:d6891. doi: 10.1136/bmj.d6891
- 41 18. Asrani SK, Larson JJ, Yawn B, Therneau TM, Kim WR. Underestimation of liver-related  
42 mortality in the United States. *Gastroenterology*. 2013;145:375-382.e371-372. doi:  
43 10.1053/j.gastro.2013.04.005
- 44 19. Census Office of The State Council PaESDotNBoS. *Tabulation on the population census of the*

- 1 *people's republic of China by county 2010*. China Statistics Press; 2012.
- 2 20. Hernaez R, Lazo M, Bonekamp S, Kamel IR, Brancati FL, Guallar E, Clark JM. Diagnostic  
3 accuracy and reliability of ultrasonography for the detection of fatty liver: A meta-analysis.  
4 *Hepatology*. 2011;54:1082-1090.
- 5 21. Charatcharoenwitthaya P, Lindor KD. Role of radiologic modalities in the management of non-  
6 alcoholic steatohepatitis. *Clinics in Liver Disease*. 2007;11:37-54.
- 7 22. Spiegelman D, Hertzmark E, Wand HC. Point and interval estimates of partial population  
8 attributable risks in cohort studies: examples and software. *Cancer Causes Control*.  
9 2007;18:571-579. doi: 10.1007/s10552-006-0090-y
- 10 23. Paik JM, Deshpande R, Golabi P, Younossi I, Henry L, Younossi ZM. The impact of modifiable  
11 risk factors on the long-term outcomes of non-alcoholic fatty liver disease. *Alimentary  
12 pharmacology & therapeutics*. 2020;51:291-304. doi: 10.1111/apt.15580
- 13 24. Kanwal F, Kramer JR, Li L, Dai J, Natarajan Y, Yu X, Asch SM, El-Serag HB. Effect of Metabolic  
14 Traits on the Risk of Cirrhosis and Hepatocellular Cancer in Nonalcoholic Fatty Liver Disease.  
15 *Hepatology*. 2020;71:808-819. doi: 10.1002/hep.31014
- 16 25. Ciardullo S, Monti T, Sala I, Grassi G, Mancina G, Perseghin G. Nonalcoholic Fatty Liver Disease  
17 and Advanced Fibrosis in US Adults Across Blood Pressure Categories. *Hypertension*.  
18 2020;76:562-568. doi: 10.1161/HYPERTENSIONAHA.120.15220
- 19 26. Lan Y, Lu Y, Li J, Hu S, Chen S, Wang Y, Yuan X, Liu H, Wang X, Wu S, et al. Outcomes of subjects  
20 who are lean, overweight or obese with nonalcoholic fatty liver disease: A cohort study in  
21 China. *Hepatol Commun*. 2022;6:3393-3405. doi: 10.1002/hep4.2081
- 22 27. Alexopoulos AS, Crowley MJ, Wang Y, Moylan CA, Guy CD, Henao R, Piercy DL, Seymour KA,  
23 Sudan R, Portenier DD, et al. Glycemic Control Predicts Severity of Hepatocyte Ballooning and  
24 Hepatic Fibrosis in Nonalcoholic Fatty Liver Disease. *Hepatology*. 2021;74:1220-1233. doi:  
25 10.1002/hep.31806
- 26 28. Zoppini G, Fedeli U, Gennaro N, Saugo M, Targher G, Bonora E. Mortality from chronic liver  
27 diseases in diabetes. *Am J Gastroenterol*. 2014;109:1020-1025. doi: 10.1038/ajg.2014.132
- 28 29. Deprince A, Haas JT, Staels B. Dysregulated lipid metabolism links NAFLD to cardiovascular  
29 disease. *Mol Metab*. 2020;42:101092. doi: 10.1016/j.molmet.2020.101092
- 30 30. de Martel C, Maucort-Boulch D, Plummer M, Franceschi S. World-wide relative contribution  
31 of hepatitis B and C viruses in hepatocellular carcinoma. *Hepatology*. 2015;62:1190-1200.  
32 doi: 10.1002/hep.27969

33  
34 **Figure legends:**

35  
36 **Figure 1. The cumulative all-cause, CVD-, and liver-related mortality rates of participants**  
37 **with different numbers of metabolic syndrome components**

38  
39 **Figure 2. The excess risk of all-cause, CVD-, and liver-related mortality among patients with**  
40 **NAFLD vs. non-NAFLD according to the number of metabolic components.**

41 Adjusted HRs: Adjusted for sex, education, smoking, physical activity, salt intake, and alanine  
42 aminotransferase.

43

Table 1. Baseline characteristics of subjects with and without NAFLD.

| Variable                 | Non-NAFLD   | NAFLD            |                |                |                  | <i>p</i> -value |
|--------------------------|-------------|------------------|----------------|----------------|------------------|-----------------|
|                          |             | G <sub>0-1</sub> | G <sub>2</sub> | G <sub>3</sub> | G <sub>4-5</sub> |                 |
| N                        | 71789       | 8115             | 10229          | 9260           | 4780             |                 |
| Age, years               | 49.1±14.6   | 48.5±12.9        | 51.6±12.7      | 53.4±12.1      | 54.3±11.5        | <0.001          |
| Male                     | 52865(73.6) | 6403(78.9)       | 8172(79.9)     | 7211(77.9)     | 3485(72.9)       | <0.001          |
| Education                |             |                  |                |                |                  | <0.001          |
| Primary school or below  | 6355(8.9)   | 541(6.7)         | 897(8.8)       | 958(10.3)      | 555(11.6)        |                 |
| Junior high school       | 47265(65.8) | 5437(67.0)       | 7129(69.7)     | 6509(70.3)     | 3341(69.9)       |                 |
| Senior high school       | 10750(15.0) | 1243(15.3)       | 1412(13.8)     | 1214(13.1)     | 589(12.3)        |                 |
| College and above        | 7419(10.3)  | 894(11.0)        | 791(7.7)       | 579(6.3)       | 295(6.2)         |                 |
| Physical activity level* |             |                  |                |                |                  | 0.003           |
| Inactive                 | 8765(12.2)  | 1002(12.3)       | 1202(11.8)     | 1044(11.3)     | 534(11.2)        |                 |
| Moderate                 | 53227(74.1) | 6127(75.5)       | 7623(74.5)     | 6843(73.9)     | 3397(71.1)       |                 |
| Frequently               | 9797(13.6)  | 986(12.2)        | 1404(13.7)     | 1373(14.8)     | 849(17.8)        |                 |
| Smoking status           |             |                  |                |                |                  | <0.001          |
| Never                    | 52061(72.5) | 5692(70.1)       | 7150(69.9)     | 6484(70.0)     | 3367(70.4)       |                 |
| Past                     | 2923(4.1)   | 341(4.2)         | 584(5.7)       | 552(6.0)       | 270(5.6)         |                 |
| Current                  | 16805(23.4) | 2082(25.7)       | 2495(24.4)     | 2224(24.0)     | 1143(23.9)       |                 |
| Salt intake              |             |                  |                |                |                  | <0.001          |
| Low (<6g/d)              | 7391(10.3)  | 790(9.7)         | 982(9.6)       | 905(9.8)       | 484(10.1)        |                 |
| Medium (6-11g/d)         | 58454(81.4) | 6627(81.7)       | 8200(80.2)     | 7429(80.2)     | 3731(78.1)       |                 |
| High (>11g/d)            | 5944(8.3)   | 698(8.6)         | 1047(10.2)     | 926(10.0)      | 565(11.8)        |                 |
| ALT (U/L)                |             |                  |                |                |                  | <0.001          |
| <40                      | 69126(96.3) | 7279(89.7)       | 8917(87.2)     | 7898(85.3)     | 3943(82.5)       |                 |
| 40-79                    | 2246(3.1)   | 713(8.8)         | 1099(10.7)     | 1138(12.3)     | 697(14.6)        |                 |
| 80-                      | 417(0.6)    | 123(1.5)         | 213(2.1)       | 224(2.4)       | 140(2.9)         |                 |

Data are presented as mean (standard deviation) or number (percentage).

\*We defined physical activity as inactive, moderately active, and active regarding the frequency of physical activity ( $\geq 20$  min/time) during leisure time with responses of never, sometimes, and  $\geq$  four times/week, respectively.

Abbreviations: NAFLD: Non-alcoholic fatty liver disease; G<sub>0-1</sub>, G<sub>2</sub>, G<sub>3</sub>, G<sub>4-5</sub>: with 0-1, 2, 3, and 4-5 metabolic syndrome components, respectively; ALT, aminotransferase.

Table 2. Standardized prevalence of metabolic syndrome components stratified by NAFLD.

| MetS components   | non-NAFLD   |                             | NAFLD       |                             | <i>P</i> |
|-------------------|-------------|-----------------------------|-------------|-----------------------------|----------|
|                   | n/N         | Standardized prevalence (%) | n/N         | Standardized prevalence (%) |          |
| Total population  |             |                             |             |                             |          |
| Elevated FBG      | 16935/71789 | 20.0                        | 13166/32384 | 36.9                        | <0.001   |
| Elevated BP       | 27109/71789 | 30.7                        | 19147/32384 | 50.9                        | <0.001   |
| Abdominal Obesity | 21063/71789 | 27.3                        | 20889/32384 | 62.7                        | <0.001   |
| Elevated TG       | 14245/71789 | 18.4                        | 16184/32384 | 47.5                        | <0.001   |
| Reduced HDL       | 7821/71789  | 15.1                        | 4738/32384  | 21.8                        | <0.001   |
| G <sub>0-1</sub>  | 46167/71789 | 68.2                        | 8129/32384  | 29.0                        | <0.001   |
| G <sub>2</sub>    | 16746/71789 | 21.0                        | 10197/32384 | 30.5                        | <0.001   |
| G <sub>3</sub>    | 7054/71789  | 8.5                         | 9285/32384  | 26.5                        | <0.001   |
| G <sub>4-5</sub>  | 1822/71789  | 2.3                         | 4773/32384  | 14.0                        | <0.001   |

Standardized prevalence: based on the direct standardization method using the Chinese 2010 census population as the reference; Elevated FBG: administration of anti-diabetes drugs or fasting blood glucose  $\geq 5.6$  mmol/L; elevated BP: administration of anti-hypertensive drugs and/or systolic blood pressure (SBP)  $\geq 140$  mmHg or diastolic blood pressure (DBP)  $\geq 90$  mmHg; abdominal obesity: waist circumference  $> 90$  cm (male) or  $> 85$  cm (female); elevated TG: TG  $\geq 1.7$  mmol/L; reduced HDL: HDL  $< 1.0$  mmol/L (male) or  $< 1.3$  mmol/L (female). Abbreviations: NAFLD: Non-alcoholic fatty liver disease; MetS: metabolic syndrome; FBG: fasting blood glucose; BP: blood pressure; TG: triglycerides; HDL: high-density lipoprotein cholesterol; G<sub>0-1</sub>, G<sub>2</sub>, G<sub>3</sub>, G<sub>4-5</sub>: with 0-1, 2, 3, and 4-5 metabolic syndrome components, respectively.

Table 3. Adjusted hazard ratios and population-attributable fractions (95% CI) of metabolic components to all-cause mortality by NAFLD status

| MetS components           | NAFLD           |                 | non-NAFLD       |                  |
|---------------------------|-----------------|-----------------|-----------------|------------------|
|                           | HR (95%CI)      | PAF (95%CI)     | HR (95%CI)      | PAF (95%CI)      |
| <b>Elevated FBG</b>       |                 |                 |                 |                  |
| All age groups            | 1.36(1.27-1.46) | 13.4(10.2-16.6) | 1.29(1.23-1.36) | 7.5(5.8-9.2)     |
| 18-49 years old           | 1.39(1.12-1.72) | 12.7(3.6-21.5)  | 1.61(1.34-1.94) | 11.8(6.4-17.2)   |
| 50-69 years old           | 1.43(1.30-1.56) | 16.0(11.7-20.2) | 1.39(1.29-1.49) | 10.3(7.7-0.12.9) |
| 70 years old or older     | 1.22(1.07-1.38) | 8.5(2.8-14.1)   | 1.10(1.01-1.20) | 2.7(0.2-5.1)     |
| <b>Elevated BP</b>        |                 |                 |                 |                  |
| All age groups            | 1.49(1.38-1.62) | 24.7(20.1-29.3) | 1.39(1.32-1.47) | 17.0(14.3-19.7)  |
| 18-49 years old           | 1.66(1.32-2.09) | 26.2(14.7-37.1) | 1.66(1.40-1.98) | 17.6(10.7-24.4)  |
| 50-69 years old           | 1.60(1.44-1.77) | 28.3(22.4-34.0) | 1.56(1.45-1.68) | 21.7(18.2-25.2)  |
| 70 years old or older     | 1.21(1.04-1.40) | 13.0(3.3-22.6)  | 1.12(1.03-1.21) | 6.8(2.0-11.5)    |
| <b>Abdominal obesity</b>  |                 |                 |                 |                  |
| All age groups            | 1.07(0.99-1.16) | 5.0(0.0-10.3)   | 1.07(1.01-1.12) | 2.4(0.4-4.4)     |
| 18-49 years old           | 1.00(0.80-1.24) | -               | 1.26(1.05-1.51) | 6.5(0.8-12.1)    |
| 50-69 years old           | 1.17(1.05-1.29) | 10.3(3.6-16.9)  | 1.11(1.03-1.19) | 3.8(1.0-6.6)     |
| 70 years old or older     | 0.93(0.80-1.08) | -               | 0.97(0.90-1.05) | -                |
| <b>Reduced HDL</b>        |                 |                 |                 |                  |
| All age groups            | 0.80(0.71-0.89) | -               | 0.89(0.81-0.98) | -                |
| 18-49 years old           | 1.04(0.75-1.45) | 0.5(0.0-4.5)    | 0.61(0.44-0.85) | -                |
| 50-69 years old           | 0.70(0.60-0.82) | -               | 0.91(0.80-1.05) | -                |
| 70 years old or older     | 0.93(0.75-1.14) | -               | 1.02(0.87-1.20) | 0.2(0.0-1.2)     |
| <b>Elevated TG</b>        |                 |                 |                 |                  |
| All age groups            | 1.08(1.01-1.16) | 3.9(0.4-7.3)    | 1.05(0.99-1.12) | 1.1(0.0-2.4)     |
| 18-49 years old           | 1.09(0.87-1.35) | 4.5(7.5-16.4)   | 1.25(1.03-1.51) | 5.3(0.0-10.7)    |
| 50-69 years old           | 1.06(0.97-1.16) | 3.1(0.0-7.8)    | 1.07(0.99-1.16) | 1.7(0.0-3.8)     |
| 70 years old or older     | 1.11(0.98-1.26) | 4.6(0.0-10.3)   | 0.94(0.85-1.04) | -                |
| <b>≥2 MetS components</b> |                 |                 |                 |                  |
| All age groups            | 1.51(1.37-1.66) | 28.5(22.5-34.2) | 1.32(1.26-1.39) | 12.5(10.2-14.7)  |
| 18-49 years old           | 1.38(1.08-1.78) | 21.2(5.5-35.8)  | 1.75(1.48-2.07) | 18.4(12.3-24.5)  |
| 50-69 years old           | 1.60(1.41-1.82) | 32.3(24.5-39.6) | 1.51(1.41-1.62) | 18.3(15.1-21.4)  |
| 70 years old or older     | 1.35(1.13-1.61) | 22.0(10.0-33.5) | 1.04(0.96-1.12) | 1.7(2.1-5.5)     |

Elevated FBG: administration of anti-diabetes drugs or fasting blood glucose  $\geq 5.6$  mmol/L; elevated BP: a dministration of anti-hypertensive drugs or systolic blood pressure(SBP)  $\geq 140$  mmHg or diastolic blood pressure(DBP)  $\geq 90$  mmHg; abdominal obesity: waist circumference  $> 90$  cm(male) or  $> 85$  cm(female); elevated TG: TG  $\geq 1.7$  mmol/L; reduced HDL: HDL  $< 1.0$  mmol/L(male) or  $< 1.3$  mmol/L(female).

Abbreviations: NAFLD: Non-alcoholic fatty liver disease; MetS: metabolic syndrome; FBG: fasting blood glucose; BP: blood pressure; TG: triglycerides; HDL: high-density lipoprotein cholesterol; G<sub>0-1</sub>, G<sub>2</sub>, G<sub>3</sub>, G<sub>4-5</sub>: with 0-1, 2, 3, and 4-5 metabolic syndrome components, respectively.

Note: The individual PAF cannot be computed for health metrics with adjusted HRs < 1.0. The negative values of the lower 95% CI in PAF were rounded to zero. HRs of each metabolism syndrome were estimated after adjusting age, sex, education, smoke status, physical activity, salt intake, ALT level, and the other 4 MetS components. HRs of the MetS components were calculated after adjusting age, sex, education, smoke status, physical activity, salt intake, and aminotransferase level. In the subgroup analyses by age, age was not adjusted.

Table 4. Adjusted hazard ratios and population-attributable fractions (95% CI) of metabolic components to CVD-related mortality by NAFLD status.

| MetS components           | NAFLD           |                 | non-NAFLD       |                 |
|---------------------------|-----------------|-----------------|-----------------|-----------------|
|                           | HR (95%CI)      | PAF (95%CI)     | HR (95%CI)      | PAF (95%CI)     |
| <b>Elevated FBG</b>       |                 |                 |                 |                 |
| All age groups            | 1.23(1.07-1.41) | 9.2(3.0-15.4)   | 1.33(1.20-1.48) | 8.5(5.1-12.0)   |
| 18-49 years old           | 1.18(0.75-1.85) | 6.4(0.0-24.5)   | 2.04(1.36-3.05) | 18.9(5.2-32.0)  |
| 50-69 years old           | 1.30(1.09-1.56) | 12.2(3.7-20.5)  | 1.51(1.31-1.76) | 13.6(8.1-19.0)  |
| 70 years old or older     | 1.08(0.85-1.37) | 3.4(0.0-14.0)   | 1.05(0.89-1.23) | 1.3(0.0-5.8)    |
| <b>Elevated BP</b>        |                 |                 |                 |                 |
| All age groups            | 1.94(1.63-2.30) | 38.6(29.9-46.8) | 1.65(1.49-1.84) | 25.9(20.5-31.1) |
| 18-49 years old           | 2.48(1.46-4.19) | 44.9(20.4-64.1) | 1.73(1.17-2.57) | 19.9(3.3-35.5)  |
| 50-69 years old           | 2.21(1.76-2.78) | 44.6(33.5-54.4) | 2.25(1.92-2.63) | 38.4(31.2-45.1) |
| 70 years old or older     | 1.37(1.03-1.82) | 20.9(2.7-37.9)  | 1.14(0.98-1.33) | 8.0(0.0-17.0)   |
| <b>Abdominal obesity</b>  |                 |                 |                 |                 |
| All age groups            | 1.09(0.93-1.27) | 6.0(0.0-16.7)   | 1.08(0.98-1.20) | 3.0(0.0-7.1)    |
| 18-49 years old           | 0.90(0.57-1.43) | -               | 1.44(0.96-2.17) | 11.0(0.0-24.5)  |
| 50-69 years old           | 1.18(0.97-1.45) | 11.2(0.0-24.3)  | 1.11(0.96-1.29) | 4.2(0.0-10.1)   |
| 70 years old or older     | 1.00(0.75-1.33) | -               | 0.99(0.86-1.15) | -               |
| <b>Reduced HDL</b>        |                 |                 |                 |                 |
| All age groups            | 0.76(0.60-0.97) | -               | 0.80(0.65-0.99) | -               |
| 18-49 years old           | 0.71(0.31-1.64) | -               | 0.52(0.23-1.19) | -               |
| 50-69 years old           | 0.71(0.52-0.96) | -               | 0.76(0.56-1.03) | -               |
| 70 years old or older     | 0.88(0.59-1.33) | -               | 0.98(0.72-1.32) | -               |
| <b>Elevated TG</b>        |                 |                 |                 |                 |
| All age groups            | 1.33(1.16-1.53) | 14.0(7.1-20.8)  | 1.13(1.01-1.27) | 2.7(0.0-5.5)    |
| 18-49 years old           | 1.58(0.99-2.55) | 24.0(0.0-47.4)  | 1.56(1.02-2.37) | 11.7(0.0-25.6)  |
| 50-69 years old           | 1.34(1.12-1.61) | 15.0(5.6-24.3)  | 1.14(0.96-1.34) | 3.2(0.0-7.6)    |
| 70 years old or older     | 1.24(0.98-1.57) | 9.7(0.0-20.4)   | 1.03(0.85-1.24) | 0.5(0.0-4.0)    |
| <b>≥2 MetS components</b> |                 |                 |                 |                 |
| All age groups            | 1.97(1.60-2.43) | 43.4(32.3-53.3) | 1.43(1.29-1.58) | 16.3(11.7-20.8) |
| 18-49 years old           | 2.36(1.27-4.38) | 48.7(17.2-71.2) | 2.30(1.57-3.39) | 28.3(13.6-41.8) |
| 50-69 years old           | 2.16(1.62-2.87) | 47.9(33.5-60.1) | 1.78(1.54-2.06) | 25.6(19.1-31.8) |
| 70 years old or older     | 1.51(1.06-2.15) | 29.4(0.0-49.5)  | 1.05(0.91-1.21) | 2.3(0.0-9.4)    |

Elevated FBG: administration of anti-diabetes drugs or fasting blood glucose  $\geq 5.6$  mmol/L; elevated BP: administration of anti-hypertensive drugs and/or systolic blood pressure(SBP)  $\geq 140$  mmHg or diastolic blood pressure(DBP)  $\geq 90$  mmHg; abdominal obesity: waist circumference  $> 90$  cm(male) or  $> 85$  cm(female); elevated TG: TG  $\geq 1.7$  mmol/L; reduced HDL: HDL  $< 1.0$  mmol/L(male) or  $< 1.3$  mmol/L(female).

Abbreviations: CVD: cerebrovascular disease; NAFLD: Non-alcoholic fatty liver disease; MetS: metabolic syndrome; FBG: fasting blood glucose; BP: blood pressure; TG: triglycerides; HDL: high-density lipoprotein cholesterol; G<sub>0-1</sub>, G<sub>2</sub>, G<sub>3</sub>, G<sub>4-5</sub>: with 0-1, 2, 3, and 4-5 metabolic syndrome components, respectively.

Note: The individual PAF cannot be computed for health metrics with adjusted HRs  $< 1.0$ . The negative values of the lower 95% CI in PAF were rounded to zero. HRs of each metabolism syndrome were estimated after adjusting for age, sex, education, smoke status, physical activity, salt intake, ALT level, and the other 4 MetS components. HRs of MetS components were calculated after adjusting age, sex, education, smoke status, physical activity, salt intake, and aminotransferase level. In the subgroup analyses by age, age was not adjusted.



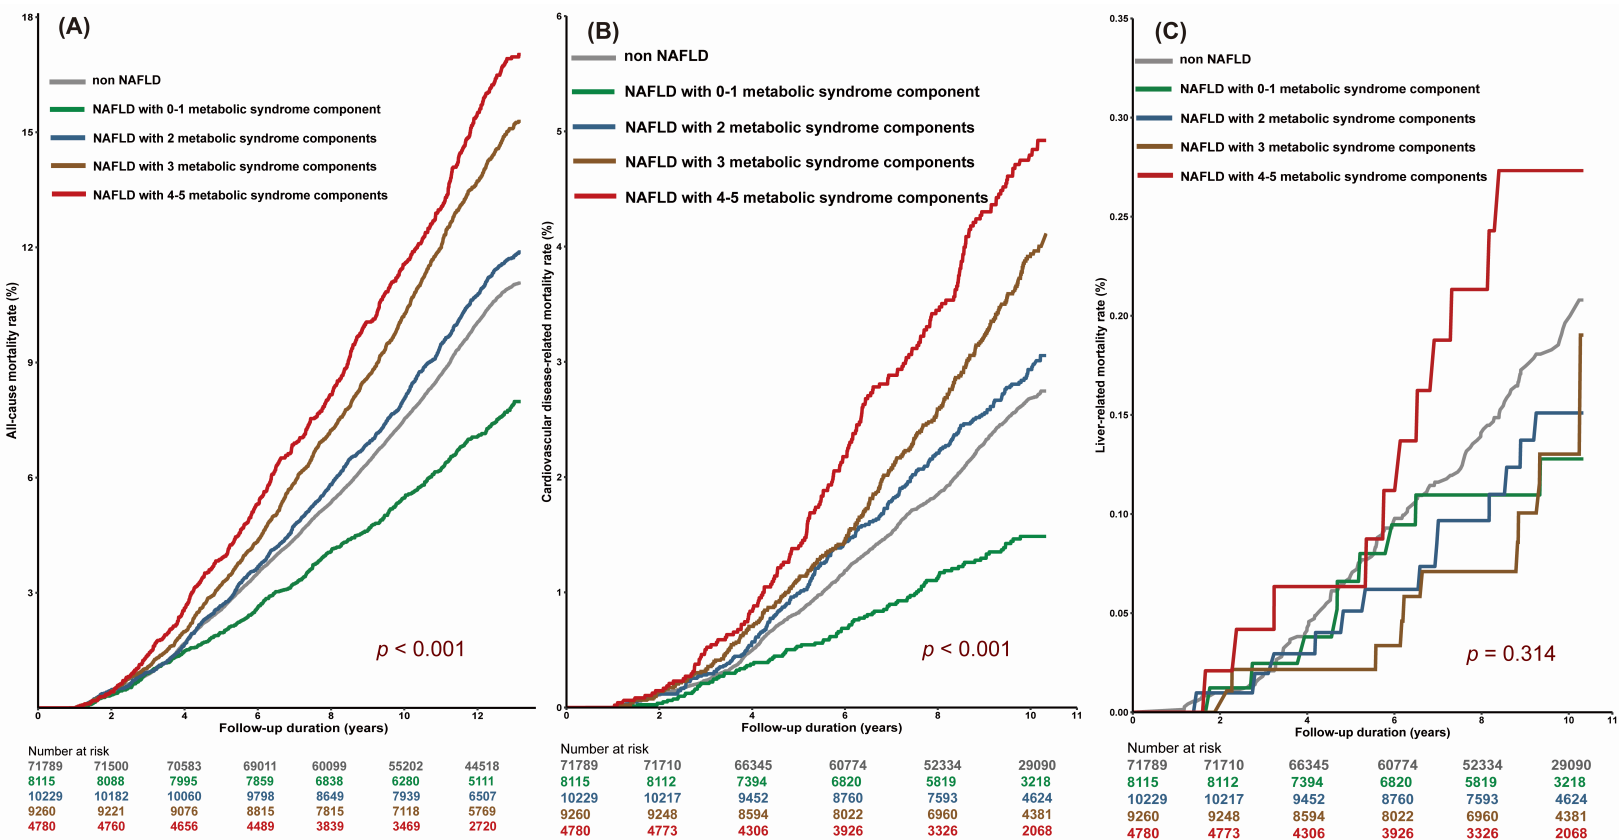

A

## All-cause mortality

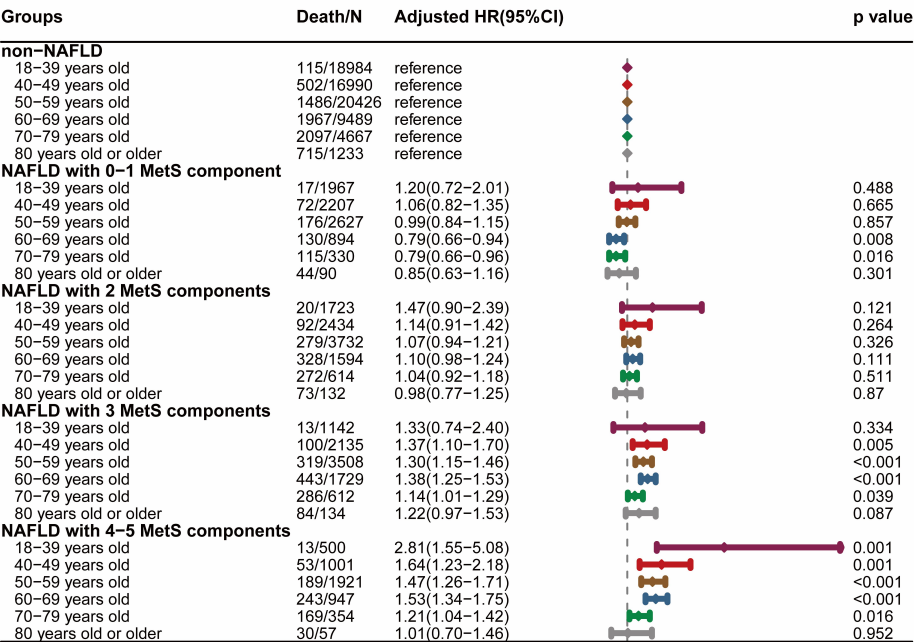

B

## CVD-related mortality

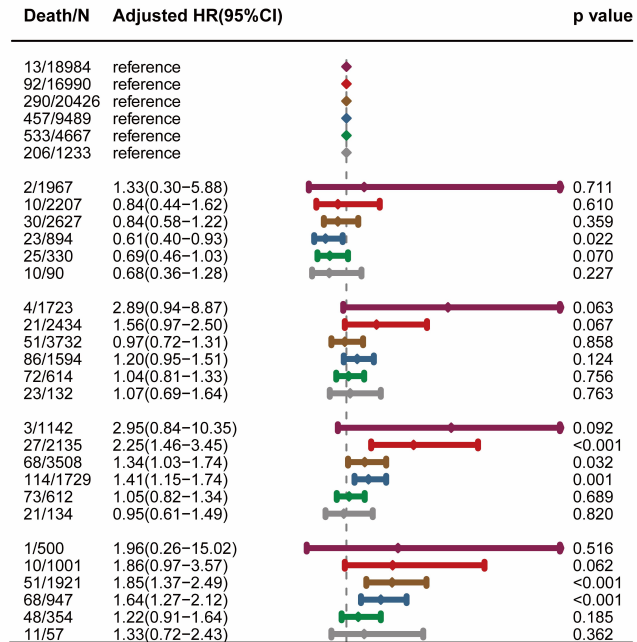

C

## Liver-related mortality

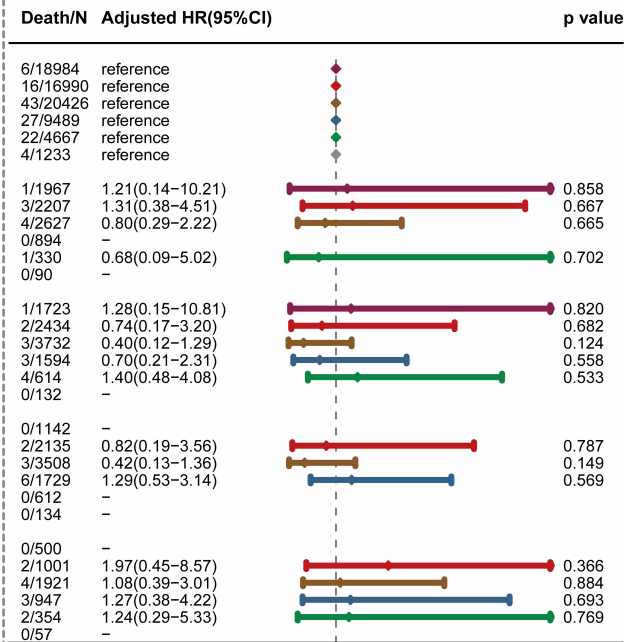

Source: https://medrxiv.org/content/10.1101/2023.08.01.23293528v1.full.pdf
